# Supplementary material for: A density functional theory study of a water gas shift reaction on Ag(111): potassium effect
Source: Royal Society of Chemistry journal article supplement (doi:10.1039/d2cp03757b), 2022-12-12
Supplement: d2cp03757b1.pdf [file d2cp03757b1.pdf]

## Supporting information

### **A density functional theory study of water gas shift reaction on Ag(111): potassium effect**

Yan-Xin Wang, Hai-Li Zhang, Hai-Shun Wu, and Jian-Feng Jia\*

(Key Laboratory of Magnetic Molecules & Magnetic Information Materials Ministry of Education,

The School of Chemical and Material Science, Shanxi Normal University, Taiyuan, 030000, China)

\*Corresponding author. Jian-Feng Jia: E-mail: [jjajf@dns.sxnu.edu.cn](mailto:jjajf@dns.sxnu.edu.cn)

#### Content

Section 1: Figures

Section 2: Tables

Section 3: Coordinates of TS structures for WGS reactions on Ag (111) and K/Ag(111)

Section 1: Figures

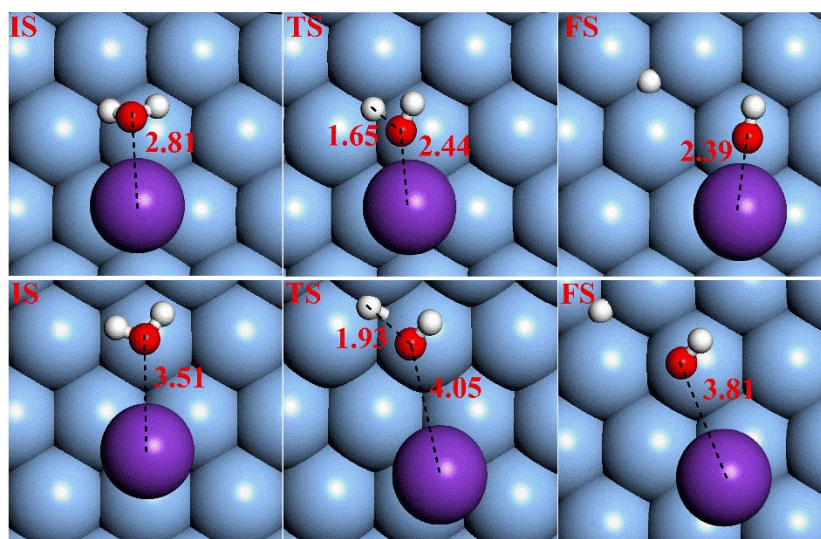

Figure S1. The IS, TS and FS optimized structures for H<sub>2</sub>O dissociation on K/Ag(111) surfaces with short-range K-O distances (top) and long-range K-O distances (bottom).

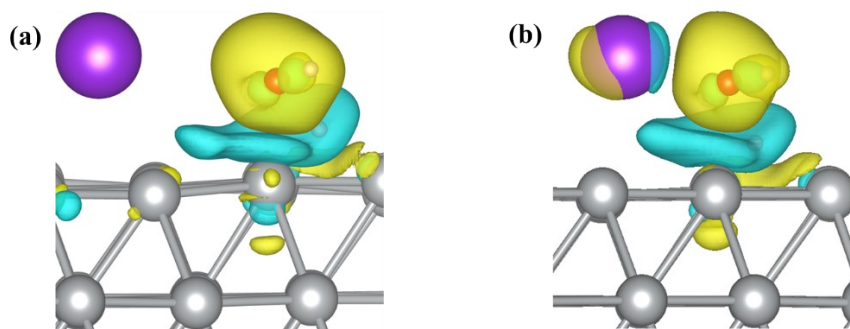

Figure S2. The charge density difference as to OH adsorption at the (a) long-range TS geometry and (b) short-range TS structure.

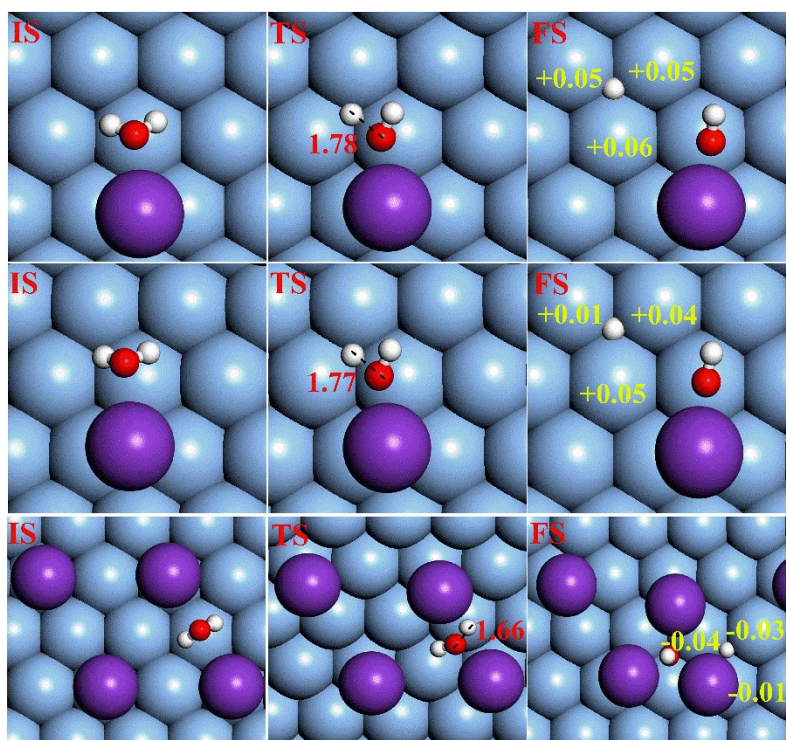

Figure S3. The IS, TS and FS optimized structures for H<sub>2</sub>O dissociation on Ag(111) surfaces with different coverages of K (6.25%, 11.1% and 25% from top to bottom). Bader charges are marked with yellow typeface on Ag atoms connected with H atoms.

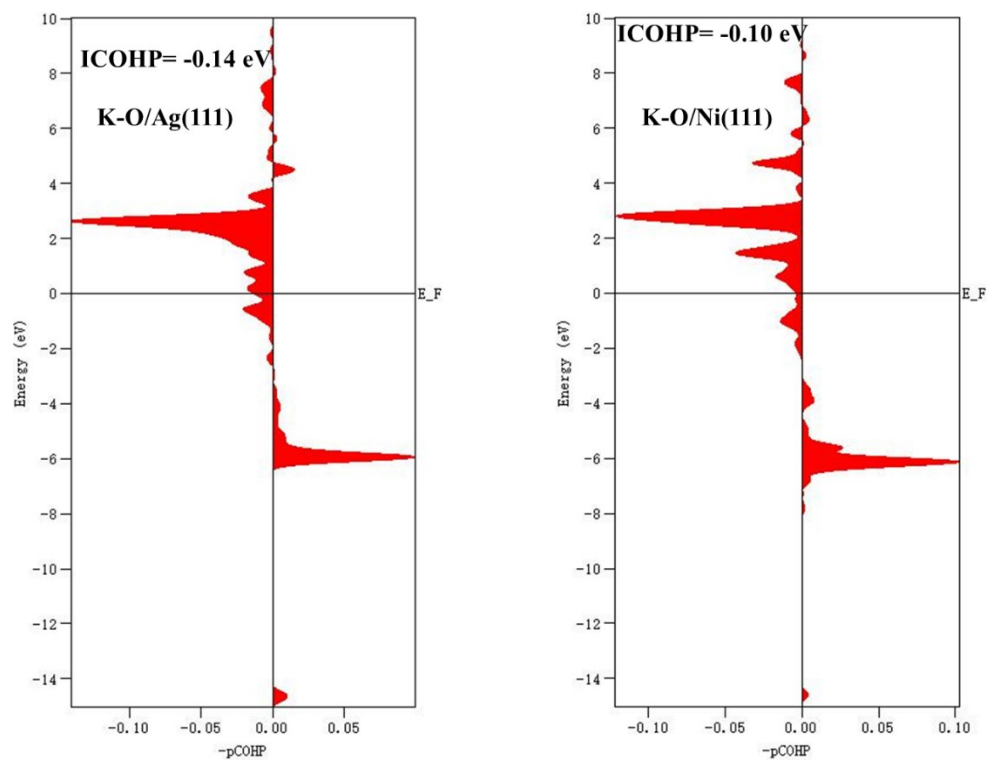

Figure S4. pCOHP bonding analysis between K-O bonding at TSs for H<sub>2</sub>O dissociation on (a) Ag(111) and (b) Ni(111) surfaces.

Section 2: Tables

Table S1 The stabilization energy of OH by Ag(111) surfaces with different coverage of K

| coverage of K        | 0     | 6.25% | 11.1% | 25%   |
|----------------------|-------|-------|-------|-------|
| stabilization energy | -4.45 | -4.51 | -4.43 | -5.07 |

Section 3: Coordinates of TS structures for WGS reactions on Ag (111) and K/Ag(111)

**R1.H<sub>2</sub>O\*+\*=OH\*+H\* on Ag (111)**

| n° | atom | Relaxed atomic coordinates (cartesian) [Å] |            |            |
|----|------|--------------------------------------------|------------|------------|
| 1  | Ag   | 0.00000000                                 | 0.00000000 | 0.09024000 |
| 2  | Ag   | 0.00246208                                 | 0.00267997 | 0.41777236 |
| 3  | Ag   | 0.21556626                                 | 0.10645743 | 0.30668016 |
| 4  | Ag   | 0.11111000                                 | 0.22222000 | 0.19797000 |
| 5  | Ag   | 0.33333000                                 | 0.00000000 | 0.09024000 |
| 6  | Ag   | 0.32605934                                 | 0.99677283 | 0.41341021 |
| 7  | Ag   | 0.55241010                                 | 0.10831917 | 0.30459210 |
| 8  | Ag   | 0.44444000                                 | 0.22222000 | 0.19797000 |
| 9  | Ag   | 0.66667002                                 | 0.00000000 | 0.09024000 |
| 10 | Ag   | 0.65763684                                 | 0.00788329 | 0.41290710 |
| 11 | Ag   | 0.88624500                                 | 0.10798216 | 0.30686614 |
| 12 | Ag   | 0.77778000                                 | 0.22222000 | 0.19797000 |
| 13 | Ag   | 1.00000000                                 | 0.33333000 | 0.09024000 |
| 14 | Ag   | 1.00057092                                 | 0.33446203 | 0.41235589 |
| 15 | Ag   | 0.22166514                                 | 0.44489198 | 0.30600967 |
| 16 | Ag   | 0.11111000                                 | 0.55555999 | 0.19797000 |
| 17 | Ag   | 0.33333000                                 | 0.33333000 | 0.09024000 |
| 18 | Ag   | 0.32598571                                 | 0.32588147 | 0.41316742 |
| 19 | Ag   | 0.55273888                                 | 0.44253846 | 0.30505888 |
| 20 | Ag   | 0.44444000                                 | 0.55555999 | 0.19797000 |
| 21 | Ag   | 0.66667002                                 | 0.33333000 | 0.09024000 |
| 22 | Ag   | 0.66462847                                 | 0.32975910 | 0.41186681 |
| 23 | Ag   | 0.88749141                                 | 0.44267530 | 0.30505698 |
| 24 | Ag   | 0.77778000                                 | 0.55555999 | 0.19797000 |
| 25 | Ag   | 1.00000000                                 | 0.66667002 | 0.09024000 |
| 26 | Ag   | 1.00153268                                 | 0.66223182 | 0.41222090 |
| 27 | Ag   | 0.22143297                                 | 0.77503335 | 0.30575591 |
| 28 | Ag   | 0.11111000                                 | 0.88889002 | 0.19797000 |
| 29 | Ag   | 0.33333000                                 | 0.66667002 | 0.09024000 |
| 30 | Ag   | 0.34056792                                 | 0.66929665 | 0.41705676 |
| 31 | Ag   | 0.55576385                                 | 0.77647086 | 0.30583549 |
| 32 | Ag   | 0.44444000                                 | 0.88889002 | 0.19797000 |
| 33 | Ag   | 0.66667002                                 | 0.66667002 | 0.09024000 |
| 34 | Ag   | 0.65875606                                 | 0.64480154 | 0.41281655 |
| 35 | Ag   | 0.88663927                                 | 0.77609404 | 0.30678524 |
| 36 | Ag   | 0.77777999                                 | 0.88889002 | 0.19797000 |
| 37 | O    | 0.75827591                                 | 0.86368133 | 0.49022353 |

|    |   |            |            |            |
|----|---|------------|------------|------------|
| 38 | H | 0.56098477 | 0.78813867 | 0.46058250 |
| 39 | H | 0.75854047 | 0.84487118 | 0.53383208 |

|                     |             |            |             |
|---------------------|-------------|------------|-------------|
| Lattice vector 1[Å] | 8.77270031  | 0.00000000 | 0.00000000  |
| Lattice vector 2[Å] | -4.38635015 | 7.59738133 | 0.00000000  |
| Lattice vector 3[Å] | 0.00000000  | 0.00000000 | 22.16290092 |

**R1.H<sub>2</sub>O\*+\*=OH\*+H\* on K/Ag (111)**

| n° | atom | Relaxed atomic coordinates (cartesian) [Å] |            |            |
|----|------|--------------------------------------------|------------|------------|
| 1  | Ag   | 0.00000000                                 | 0.00000000 | 0.09024000 |
| 2  | Ag   | 0.00439855                                 | 0.99798114 | 0.41308616 |
| 3  | Ag   | 0.22267740                                 | 0.10687843 | 0.30434227 |
| 4  | Ag   | 0.11111000                                 | 0.22222000 | 0.19797000 |
| 5  | Ag   | 0.33333001                                 | 0.00000000 | 0.09024000 |
| 6  | Ag   | 0.33503374                                 | 0.00195156 | 0.41384325 |
| 7  | Ag   | 0.55658063                                 | 0.10672735 | 0.30529182 |
| 8  | Ag   | 0.44444001                                 | 0.22222000 | 0.19797000 |
| 9  | Ag   | 0.66667002                                 | 0.00000000 | 0.09024000 |
| 10 | Ag   | 0.66494381                                 | 0.99297827 | 0.41649655 |
| 11 | Ag   | 0.88783798                                 | 0.10742997 | 0.30662411 |
| 12 | Ag   | 0.77778000                                 | 0.22222000 | 0.19797000 |
| 13 | Ag   | 1.00000000                                 | 0.33333001 | 0.09024000 |
| 14 | Ag   | 1.00209754                                 | 0.32908920 | 0.41342927 |
| 15 | Ag   | 0.22399365                                 | 0.44451646 | 0.30582802 |
| 16 | Ag   | 0.11111001                                 | 0.55556002 | 0.19797000 |
| 17 | Ag   | 0.33333001                                 | 0.33333001 | 0.09024000 |
| 18 | Ag   | 0.33215767                                 | 0.32627803 | 0.41016192 |
| 19 | Ag   | 0.55847541                                 | 0.44493336 | 0.30604654 |
| 20 | Ag   | 0.44444001                                 | 0.55556002 | 0.19797000 |
| 21 | Ag   | 0.66667002                                 | 0.33333000 | 0.09024000 |
| 22 | Ag   | 0.66923136                                 | 0.32617585 | 0.41138745 |
| 23 | Ag   | 0.89088851                                 | 0.44189695 | 0.30521366 |
| 24 | Ag   | 0.77778000                                 | 0.55556002 | 0.19797000 |
| 25 | Ag   | 1.00000000                                 | 0.66667002 | 0.09024000 |
| 26 | Ag   | 1.00475643                                 | 0.66216807 | 0.41282522 |
| 27 | Ag   | 0.22485770                                 | 0.77544036 | 0.30609704 |
| 28 | Ag   | 0.11110999                                 | 0.88889003 | 0.19797000 |
| 29 | Ag   | 0.33333001                                 | 0.66667002 | 0.09024000 |
| 30 | Ag   | 0.33812491                                 | 0.66511970 | 0.41627603 |
| 31 | Ag   | 0.55780622                                 | 0.77439729 | 0.30619075 |
| 32 | Ag   | 0.44444001                                 | 0.88889003 | 0.19797000 |
| 33 | Ag   | 0.66667002                                 | 0.66667002 | 0.09024000 |
| 34 | Ag   | 0.67299428                                 | 0.65962570 | 0.41738314 |
| 35 | Ag   | 0.88803665                                 | 0.77421391 | 0.30704132 |



|    |    |            |            |            |
|----|----|------------|------------|------------|
| 36 | Ag | 0.77778000 | 0.88889003 | 0.19797000 |
| 37 | O  | 0.62811230 | 0.69762223 | 0.52536320 |
| 38 | H  | 0.55387320 | 0.77583646 | 0.46508487 |
| 39 | H  | 0.73005426 | 0.81223962 | 0.53424998 |
| 40 | K  | 0.50546238 | 0.38695049 | 0.55068891 |

|                     |             |            |             |
|---------------------|-------------|------------|-------------|
| Lattice vector 1[Å] | 8.77270031  | 0.00000000 | 0.00000000  |
| Lattice vector 2[Å] | -4.38635015 | 7.59738133 | 0.00000000  |
| Lattice vector 3[Å] | 0.00000000  | 0.00000000 | 22.16290092 |

### R2.OH\*+\*=O\*+H\* on Ag (111)

| n° | atom | Relaxed atomic coordinates (cartesian) [Å] |            |            |
|----|------|--------------------------------------------|------------|------------|
| 1  | Ag   | 0.00000000                                 | 0.00000000 | 0.09024000 |
| 2  | Ag   | 0.01014834                                 | 0.00790425 | 0.41779751 |
| 3  | Ag   | 0.21767759                                 | 0.11027062 | 0.30634991 |
| 4  | Ag   | 0.11111000                                 | 0.22222000 | 0.19797000 |
| 5  | Ag   | 0.33333001                                 | 0.00000000 | 0.09024000 |
| 6  | Ag   | 0.33204109                                 | 0.00329955 | 0.41232534 |
| 7  | Ag   | 0.55666900                                 | 0.11170558 | 0.30524541 |
| 8  | Ag   | 0.44444001                                 | 0.22222000 | 0.19797000 |
| 9  | Ag   | 0.66667002                                 | 0.00000000 | 0.09024000 |
| 10 | Ag   | 0.66528135                                 | 0.01824905 | 0.41597191 |
| 11 | Ag   | 0.88846742                                 | 0.11243860 | 0.30659358 |
| 12 | Ag   | 0.77778000                                 | 0.22222000 | 0.19797000 |
| 13 | Ag   | 1.00000000                                 | 0.33333001 | 0.09024000 |
| 14 | Ag   | 0.00443358                                 | 0.34183438 | 0.41189111 |
| 15 | Ag   | 0.22377103                                 | 0.44779356 | 0.30569963 |
| 16 | Ag   | 0.11111000                                 | 0.55555999 | 0.19797000 |
| 17 | Ag   | 0.33333001                                 | 0.33333000 | 0.09024000 |
| 18 | Ag   | 0.33214635                                 | 0.33409742 | 0.41201536 |
| 19 | Ag   | 0.55628110                                 | 0.44902241 | 0.30558394 |
| 20 | Ag   | 0.44444001                                 | 0.55555999 | 0.19797000 |
| 21 | Ag   | 0.66667002                                 | 0.33333001 | 0.09024000 |
| 22 | Ag   | 0.66862812                                 | 0.33785428 | 0.41132689 |
| 23 | Ag   | 0.88965775                                 | 0.44655474 | 0.30533102 |
| 24 | Ag   | 0.77778000                                 | 0.55555999 | 0.19797000 |
| 25 | Ag   | 1.00000000                                 | 0.66667002 | 0.09024000 |
| 26 | Ag   | 0.00370244                                 | 0.66879070 | 0.41232724 |
| 27 | Ag   | 0.22242373                                 | 0.77935968 | 0.30532453 |
| 28 | Ag   | 0.11111000                                 | 0.88889003 | 0.19797000 |
| 29 | Ag   | 0.33333001                                 | 0.66667002 | 0.09024000 |
| 30 | Ag   | 0.33624406                                 | 0.67143148 | 0.41535918 |
| 31 | Ag   | 0.55667935                                 | 0.77987964 | 0.30576358 |

|    |    |            |            |            |
|----|----|------------|------------|------------|
| 32 | Ag | 0.44444001 | 0.88889003 | 0.19797000 |
| 33 | Ag | 0.66667002 | 0.66667002 | 0.09024000 |
| 34 | Ag | 0.66278265 | 0.65281133 | 0.41544618 |
| 35 | Ag | 0.88889054 | 0.77987462 | 0.30673379 |
| 36 | Ag | 0.77778000 | 0.88889003 | 0.19797000 |
| 37 | O  | 0.77617135 | 0.88716135 | 0.47322055 |
| 38 | H  | 0.53807558 | 0.81220205 | 0.45679524 |

|                     |             |            |             |
|---------------------|-------------|------------|-------------|
| Lattice vector 1[Å] | 8.77270031  | 0.00000000 | 0.00000000  |
| Lattice vector 2[Å] | -4.38635015 | 7.59738133 | 0.00000000  |
| Lattice vector 3[Å] | 0.00000000  | 0.00000000 | 22.16290092 |

### R2.OH\*+\*=O\*+H\* on K/Ag (111)

| n° | atom | Relaxed atomic coordinates (cartesian) [Å] |            |            |
|----|------|--------------------------------------------|------------|------------|
| 1  | Ag   | 0.00000000                                 | 0.00000000 | 0.09024000 |
| 2  | Ag   | 0.01796843                                 | 1.00585709 | 0.41798951 |
| 3  | Ag   | 0.22011024                                 | 0.11216187 | 0.30645348 |
| 4  | Ag   | 0.11111000                                 | 0.22222000 | 0.19797000 |
| 5  | Ag   | 0.33333001                                 | 0.00000000 | 0.09024000 |
| 6  | Ag   | 0.33375700                                 | 0.99993358 | 0.41233493 |
| 7  | Ag   | 0.55761918                                 | 0.11229016 | 0.30534421 |
| 8  | Ag   | 0.44444001                                 | 0.22222000 | 0.19797000 |
| 9  | Ag   | 0.66667002                                 | 0.00000000 | 0.09024000 |
| 10 | Ag   | 0.65615706                                 | 1.00658221 | 0.41461981 |
| 11 | Ag   | 0.88946852                                 | 0.11158576 | 0.30612622 |
| 12 | Ag   | 0.77777800                                 | 0.22222000 | 0.19797000 |
| 13 | Ag   | 1.00000000                                 | 0.33333001 | 0.09024000 |
| 14 | Ag   | -0.00154350                                | 0.32911111 | 0.41695905 |
| 15 | Ag   | 0.22059527                                 | 0.44440318 | 0.30539174 |
| 16 | Ag   | 0.11111000                                 | 0.55555999 | 0.19797000 |
| 17 | Ag   | 0.33333001                                 | 0.33333001 | 0.09024000 |
| 18 | Ag   | 0.33732872                                 | 0.33918113 | 0.41326693 |
| 19 | Ag   | 0.55835882                                 | 0.45016615 | 0.30616290 |
| 20 | Ag   | 0.44444001                                 | 0.55555999 | 0.19797000 |
| 21 | Ag   | 0.66667002                                 | 0.33333001 | 0.09024000 |
| 22 | Ag   | 0.66770362                                 | 0.33784767 | 0.41275953 |
| 23 | Ag   | 0.89074480                                 | 0.44539711 | 0.30606312 |
| 24 | Ag   | 0.77778000                                 | 0.55555999 | 0.19797000 |
| 25 | Ag   | 1.00000000                                 | 0.66667002 | 0.09024000 |
| 26 | Ag   | 0.00313864                                 | 0.66526371 | 0.41264153 |
| 27 | Ag   | 0.22188557                                 | 0.77865102 | 0.30469740 |
| 28 | Ag   | 0.11111000                                 | 0.88889003 | 0.19797000 |
| 29 | Ag   | 0.33333001                                 | 0.66667002 | 0.09024000 |

|    |    |            |            |            |
|----|----|------------|------------|------------|
| 30 | Ag | 0.32859462 | 0.66465000 | 0.41102407 |
| 31 | Ag | 0.55699862 | 0.78045447 | 0.30578685 |
| 32 | Ag | 0.44444001 | 0.88889003 | 0.19797000 |
| 33 | Ag | 0.66667002 | 0.66667002 | 0.09024000 |
| 34 | Ag | 0.66712629 | 0.66334622 | 0.41546881 |
| 35 | Ag | 0.89081877 | 0.78091045 | 0.30672499 |
| 36 | Ag | 0.77778000 | 0.88889003 | 0.19797000 |
| 37 | O  | 0.77785898 | 0.89000679 | 0.48130278 |
| 38 | H  | 0.88391366 | 0.11160824 | 0.45783398 |
| 39 | K  | 0.53424167 | 0.74286386 | 0.55141356 |

|                     |             |            |             |
|---------------------|-------------|------------|-------------|
| Lattice vector 1[Å] | 8.77270031  | 0.00000000 | 0.00000000  |
| Lattice vector 2[Å] | -4.38635015 | 7.59738133 | 0.00000000  |
| Lattice vector 3[Å] | 0.00000000  | 0.00000000 | 22.16290092 |

### R3.OH\*+OH\*=H<sub>2</sub>O\*+O\* on Ag (111)

| n° | atom | Relaxed atomic coordinates (cartesian) [Å] |            |            |
|----|------|--------------------------------------------|------------|------------|
| 1  | Ag   | 0.00000000                                 | 0.00000000 | 0.09024000 |
| 2  | Ag   | 0.00579465                                 | 0.00336109 | 0.41749651 |
| 3  | Ag   | 0.21651229                                 | 0.10851149 | 0.30603639 |
| 4  | Ag   | 0.11111000                                 | 0.22222000 | 0.19797000 |
| 5  | Ag   | 0.33333001                                 | 0.00000000 | 0.09024000 |
| 6  | Ag   | 0.33104794                                 | 1.00193901 | 0.41175903 |
| 7  | Ag   | 0.55567839                                 | 0.10917078 | 0.30486859 |
| 8  | Ag   | 0.44444001                                 | 0.22222000 | 0.19797000 |
| 9  | Ag   | 0.66667002                                 | 0.00000000 | 0.09024000 |
| 10 | Ag   | 0.66585622                                 | 0.01312152 | 0.41155042 |
| 11 | Ag   | 0.88964777                                 | 0.11058341 | 0.30561304 |
| 12 | Ag   | 0.77778000                                 | 0.22222000 | 0.19797000 |
| 13 | Ag   | 1.00000000                                 | 0.33333001 | 0.09024000 |
| 14 | Ag   | 1.00135267                                 | 0.33684302 | 0.41183305 |
| 15 | Ag   | 0.22449642                                 | 0.44805840 | 0.30715163 |
| 16 | Ag   | 0.11111000                                 | 0.55555999 | 0.19797000 |
| 17 | Ag   | 0.33333001                                 | 0.33333001 | 0.09024000 |
| 18 | Ag   | 0.33100983                                 | 0.33011778 | 0.41226840 |
| 19 | Ag   | 0.55563717                                 | 0.44639747 | 0.30503986 |
| 20 | Ag   | 0.44444001                                 | 0.55555999 | 0.19797000 |
| 21 | Ag   | 0.66667002                                 | 0.33333001 | 0.09024000 |
| 22 | Ag   | 0.66569931                                 | 0.33248027 | 0.41123197 |
| 23 | Ag   | 0.88808761                                 | 0.44412755 | 0.30477471 |
| 24 | Ag   | 0.77778000                                 | 0.55555999 | 0.19797000 |
| 25 | Ag   | 1.00000000                                 | 0.66667002 | 0.09024000 |
| 26 | Ag   | 1.00087109                                 | 0.66489227 | 0.41160329 |

|    |    |            |            |            |
|----|----|------------|------------|------------|
| 27 | Ag | 0.22387817 | 0.77680610 | 0.30668601 |
| 28 | Ag | 0.11111000 | 0.88889003 | 0.19797000 |
| 29 | Ag | 0.33333001 | 0.66667002 | 0.09024000 |
| 30 | Ag | 0.32947065 | 0.66617236 | 0.41826375 |
| 31 | Ag | 0.55459970 | 0.77714733 | 0.30712266 |
| 32 | Ag | 0.44444001 | 0.88889003 | 0.19797000 |
| 33 | Ag | 0.66667002 | 0.66667002 | 0.09024000 |
| 34 | Ag | 0.66502270 | 0.65147003 | 0.41174643 |
| 35 | Ag | 0.88972045 | 0.77919063 | 0.30568193 |
| 36 | Ag | 0.77778000 | 0.88889003 | 0.19797000 |
| 37 | O  | 0.75426265 | 0.87460060 | 0.47482493 |
| 38 | O  | 0.45073447 | 0.73470900 | 0.51048530 |
| 39 | H  | 0.61890105 | 0.81532612 | 0.49814729 |
| 40 | H  | 0.42018853 | 0.80829364 | 0.53466157 |

|                     |             |            |             |
|---------------------|-------------|------------|-------------|
| Lattice vector 1[Å] | 8.77270031  | 0.00000000 | 0.00000000  |
| Lattice vector 2[Å] | -4.38635015 | 7.59738133 | 0.00000000  |
| Lattice vector 3[Å] | 0.00000000  | 0.00000000 | 22.16290092 |

### R3.OH\*+OH\*=H<sub>2</sub>O\*+O\* on K/Ag (111)

| n° | atom | Relaxed atomic coordinates (cartesian) [Å] |            |            |
|----|------|--------------------------------------------|------------|------------|
| 1  | Ag   | 0.00000000                                 | 0.00000000 | 0.09024000 |
| 2  | Ag   | 0.01065035                                 | 0.00553760 | 0.41856667 |
| 3  | Ag   | 0.22083688                                 | 0.10994588 | 0.30648241 |
| 4  | Ag   | 0.11111000                                 | 0.22222000 | 0.19797000 |
| 5  | Ag   | 0.33333001                                 | 0.00000000 | 0.09024000 |
| 6  | Ag   | 0.33701781                                 | 1.00234668 | 0.41260817 |
| 7  | Ag   | 0.55979643                                 | 0.11064878 | 0.30563049 |
| 8  | Ag   | 0.44444001                                 | 0.22222000 | 0.19797000 |
| 9  | Ag   | 0.66667002                                 | 0.00000000 | 0.09024000 |
| 10 | Ag   | 0.67260320                                 | 0.01327341 | 0.41333345 |
| 11 | Ag   | 0.89353329                                 | 0.11286635 | 0.30622017 |
| 12 | Ag   | 0.77778000                                 | 0.22222000 | 0.19797000 |
| 13 | Ag   | 1.00000000                                 | 0.33333001 | 0.09024000 |
| 14 | Ag   | 1.00791688                                 | 0.33988136 | 0.41247888 |
| 15 | Ag   | 0.22735125                                 | 0.44876967 | 0.30669564 |
| 16 | Ag   | 0.11111000                                 | 0.55555999 | 0.19797000 |
| 17 | Ag   | 0.33333001                                 | 0.33333001 | 0.09024000 |
| 18 | Ag   | 0.33635430                                 | 0.33318710 | 0.41245079 |
| 19 | Ag   | 0.55873051                                 | 0.44645360 | 0.30444834 |
| 20 | Ag   | 0.44444001                                 | 0.55555999 | 0.19797000 |
| 21 | Ag   | 0.66667002                                 | 0.33333001 | 0.09024000 |
| 22 | Ag   | 0.67173914                                 | 0.33535461 | 0.41215075 |

|    |    |            |            |            |
|----|----|------------|------------|------------|
| 23 | Ag | 0.89236270 | 0.44577583 | 0.30486151 |
| 24 | Ag | 0.77778000 | 0.55555999 | 0.19797000 |
| 25 | Ag | 1.00000000 | 0.66667002 | 0.09024000 |
| 26 | Ag | 0.00687216 | 0.66786605 | 0.41200132 |
| 27 | Ag | 0.22719105 | 0.77824411 | 0.30655236 |
| 28 | Ag | 0.11111000 | 0.88889003 | 0.19797000 |
| 29 | Ag | 0.33333001 | 0.66667002 | 0.09024000 |
| 30 | Ag | 0.33846394 | 0.66982878 | 0.41832315 |
| 31 | Ag | 0.55748835 | 0.77961895 | 0.30637464 |
| 32 | Ag | 0.44444001 | 0.88889003 | 0.19797000 |
| 33 | Ag | 0.66667002 | 0.66667002 | 0.09024000 |
| 34 | Ag | 0.66791090 | 0.65626323 | 0.40898863 |
| 35 | Ag | 0.89409864 | 0.78069224 | 0.30525142 |
| 36 | Ag | 0.77778000 | 0.88889003 | 0.19797000 |
| 37 | O  | 0.76114693 | 0.86923930 | 0.47923558 |
| 38 | O  | 0.47974995 | 0.75430478 | 0.53107164 |
| 39 | H  | 0.61654563 | 0.82638934 | 0.50648010 |
| 40 | H  | 0.45262630 | 0.84405421 | 0.54399983 |
| 41 | K  | 0.66319330 | 0.60392694 | 0.55477190 |

|                     |             |            |             |
|---------------------|-------------|------------|-------------|
| Lattice vector 1[Å] | 8.77270031  | 0.00000000 | 0.00000000  |
| Lattice vector 2[Å] | -4.38635015 | 7.59738133 | 0.00000000  |
| Lattice vector 3[Å] | 0.00000000  | 0.00000000 | 22.16290092 |

#### R4.H\*+H\*= H<sub>2</sub>\* on Ag (111)

| n° | atom | Relaxed atomic coordinates (cartesian) [Å] |            |             |
|----|------|--------------------------------------------|------------|-------------|
| 1  | Ag   | 0.00000000                                 | 0.00000000 | 0.09024000  |
| 2  | Ag   | 1.00308719                                 | 1.00572252 | 0.41280407  |
| 3  | Ag   | 0.22287586                                 | 0.11242814 | 0.30539490  |
| 4  | Ag   | 0.11111000                                 | 0.22222000 | 0.19797000  |
| 5  | Ag   | 0.33333001                                 | 0.00000000 | 0.09024000  |
| 6  | Ag   | 0.33314782                                 | 1.00128324 | 0.41339182  |
| 7  | Ag   | 0.55522382                                 | 0.11270939 | 0.30554665  |
| 8  | Ag   | 0.44444001                                 | 0.22222000 | 0.19797000  |
| 9  | Ag   | 0.66667002                                 | 0.00000000 | 0.09024000  |
| 10 | Ag   | 0.66752690                                 | 1.00574145 | 0.412891780 |
| 11 | Ag   | 0.88894949                                 | 0.11235463 | 0.305853364 |
| 12 | Ag   | 0.77778000                                 | 0.22222000 | 0.197970003 |
| 13 | Ag   | 1.00000000                                 | 0.33333001 | 0.090240002 |
| 14 | Ag   | 1.00059576                                 | 0.33610729 | 0.413773416 |
| 15 | Ag   | 0.22237297                                 | 0.44595246 | 0.306139437 |
| 16 | Ag   | 0.11111000                                 | 0.55556000 | 0.197970003 |
| 17 | Ag   | 0.33333001                                 | 0.33333001 | 0.090240002 |

|    |    |             |            |             |
|----|----|-------------|------------|-------------|
| 18 | Ag | 0.33063955  | 0.33243898 | 0.413239443 |
| 19 | Ag | 0.55553756  | 0.44554238 | 0.305235430 |
| 20 | Ag | 0.44444000  | 0.55555999 | 0.197970003 |
| 21 | Ag | 0.66667002  | 0.33333001 | 0.09024000  |
| 22 | Ag | 0.66696408  | 0.33312526 | 0.41363105  |
| 23 | Ag | 0.88920638  | 0.44589778 | 0.30619350  |
| 24 | Ag | 0.77778000  | 0.55555999 | 0.19797000  |
| 25 | Ag | 1.00000000  | 0.66667002 | 0.09024000  |
| 26 | Ag | -0.00119584 | 0.66805748 | 0.41597772  |
| 27 | Ag | 0.22147324  | 0.77753531 | 0.30677329  |
| 28 | Ag | 0.11111000  | 0.88889003 | 0.19797000  |
| 29 | Ag | 0.33333001  | 0.66667002 | 0.09024000  |
| 30 | Ag | 0.33357366  | 0.66829501 | 0.41560582  |
| 31 | Ag | 0.55638050  | 0.77833108 | 0.30626914  |
| 32 | Ag | 0.44444001  | 0.88889003 | 0.19797000  |
| 33 | Ag | 0.66667002  | 0.66667002 | 0.09024000  |
| 34 | Ag | 0.66810313  | 0.67332240 | 0.41256238  |
| 35 | Ag | 0.88739557  | 0.77816297 | 0.30636863  |
| 36 | Ag | 0.77778000  | 0.88889003 | 0.19797000  |
| 37 | H  | 0.73235804  | 0.61501153 | 0.47659179  |
| 38 | H  | 0.56152666  | 0.62366735 | 0.47944738  |

|                     |             |            |             |
|---------------------|-------------|------------|-------------|
| Lattice vector 1[Å] | 8.77270031  | 0.00000000 | 0.00000000  |
| Lattice vector 2[Å] | -4.38635015 | 7.59738133 | 0.00000000  |
| Lattice vector 3[Å] | 0.00000000  | 0.00000000 | 22.16290092 |

#### R4.H\*+H\*= H<sub>2</sub>\* on K/Ag (111)

| n° | atom | Relaxed atomic coordinates (cartesian) [Å] |            |            |
|----|------|--------------------------------------------|------------|------------|
| 1  | Ag   | 0.00000000                                 | 0.00000000 | 0.09024000 |
| 2  | Ag   | 1.00535497                                 | 1.00556592 | 0.41131728 |
| 3  | Ag   | 0.22422810                                 | 0.11298558 | 0.30538029 |
| 4  | Ag   | 0.11111000                                 | 0.22222000 | 0.19797000 |
| 5  | Ag   | 0.33333001                                 | 0.00000000 | 0.09024000 |
| 6  | Ag   | 0.33398329                                 | 1.00172556 | 0.41447770 |
| 7  | Ag   | 0.55491159                                 | 0.11333292 | 0.30490423 |
| 8  | Ag   | 0.44444001                                 | 0.22222000 | 0.19797000 |
| 9  | Ag   | 0.66667002                                 | 0.00000000 | 0.09024000 |
| 10 | Ag   | 0.66559524                                 | 1.00545484 | 0.40979196 |
| 11 | Ag   | 0.88999299                                 | 0.11282212 | 0.30449437 |
| 12 | Ag   | 0.77778000                                 | 0.22222000 | 0.19797000 |
| 13 | Ag   | 1.00000000                                 | 0.33333001 | 0.09024000 |
| 14 | Ag   | 1.00016043                                 | 0.33388591 | 0.41514279 |
| 15 | Ag   | 0.22220663                                 | 0.44496646 | 0.30698830 |

|    |    |            |            |            |
|----|----|------------|------------|------------|
| 16 | Ag | 0.11111000 | 0.55555999 | 0.19797000 |
| 17 | Ag | 0.33333001 | 0.33333001 | 0.09024000 |
| 18 | Ag | 0.33069721 | 0.33278674 | 0.41594320 |
| 19 | Ag | 0.55601360 | 0.44539991 | 0.30734381 |
| 20 | Ag | 0.44444001 | 0.55555999 | 0.19797000 |
| 21 | Ag | 0.66667002 | 0.33333001 | 0.09024000 |
| 22 | Ag | 0.66851802 | 0.33248360 | 0.41586107 |
| 23 | Ag | 0.88938312 | 0.44505100 | 0.30699257 |
| 24 | Ag | 0.77778000 | 0.55555999 | 0.19797000 |
| 25 | Ag | 1.00000000 | 0.66667002 | 0.09024000 |
| 26 | Ag | 0.00029239 | 0.66750078 | 0.41722006 |
| 27 | Ag | 0.22176903 | 0.77701444 | 0.30747511 |
| 28 | Ag | 0.11111000 | 0.88889003 | 0.19797000 |
| 29 | Ag | 0.33333001 | 0.66667002 | 0.09024000 |
| 30 | Ag | 0.33347519 | 0.66756717 | 0.41711997 |
| 31 | Ag | 0.55621236 | 0.77562103 | 0.30678650 |
| 32 | Ag | 0.44444001 | 0.88889003 | 0.19797000 |
| 33 | Ag | 0.66667002 | 0.66667002 | 0.09024000 |
| 34 | Ag | 0.67093939 | 0.67569459 | 0.41728530 |
| 35 | Ag | 0.88627846 | 0.77609648 | 0.30719046 |
| 36 | Ag | 0.77778000 | 0.88889003 | 0.19797000 |
| 37 | H  | 0.71788552 | 0.60032882 | 0.48258417 |
| 38 | H  | 0.54817859 | 0.59778042 | 0.48245693 |
| 39 | K  | 0.82476957 | 1.01636600 | 0.54204421 |

|                     |             |            |             |
|---------------------|-------------|------------|-------------|
| Lattice vector 1[Å] | 8.77270031  | 0.00000000 | 0.00000000  |
| Lattice vector 2[Å] | -4.38635015 | 7.59738133 | 0.00000000  |
| Lattice vector 3[Å] | 0.00000000  | 0.00000000 | 22.16290092 |

### R5.CO\*+OH\*=cis-COOH\* on Ag (111)

| n° | atom | Relaxed atomic coordinates (cartesian) [Å] |            |            |
|----|------|--------------------------------------------|------------|------------|
| 1  | Ag   | 0.00000000                                 | 0.00000000 | 0.09024000 |
| 2  | Ag   | 0.99103413                                 | 0.99299649 | 0.41164664 |
| 3  | Ag   | 0.22096286                                 | 0.11155718 | 0.30602930 |
| 4  | Ag   | 0.11111000                                 | 0.22222000 | 0.19797000 |
| 5  | Ag   | 0.33333001                                 | 0.00000000 | 0.09024000 |
| 6  | Ag   | 0.32837084                                 | 0.99491519 | 0.41217391 |
| 7  | Ag   | 0.55469501                                 | 0.11309022 | 0.30648731 |
| 8  | Ag   | 0.44444001                                 | 0.22222000 | 0.19797000 |
| 9  | Ag   | 0.66667002                                 | 0.00000000 | 0.09024000 |
| 10 | Ag   | 0.66181752                                 | 0.99685659 | 0.41294968 |
| 11 | Ag   | 0.88695669                                 | 0.10967801 | 0.30472251 |
| 12 | Ag   | 0.77778000                                 | 0.22222000 | 0.19797000 |

|    |    |             |            |            |
|----|----|-------------|------------|------------|
| 13 | Ag | 1.00000000  | 0.33333001 | 0.09024000 |
| 14 | Ag | 0.99112991  | 0.32999021 | 0.41166836 |
| 15 | Ag | 0.22102108  | 0.44178092 | 0.30606339 |
| 16 | Ag | 0.11111000  | 0.55555999 | 0.19797000 |
| 17 | Ag | 0.33333001  | 0.33333001 | 0.09024000 |
| 18 | Ag | 0.31283944  | 0.32235898 | 0.41527364 |
| 19 | Ag | 0.55164884  | 0.44196035 | 0.30831559 |
| 20 | Ag | 0.44444001  | 0.55555999 | 0.19797000 |
| 21 | Ag | 0.66667002  | 0.33333001 | 0.09024000 |
| 22 | Ag | 0.66360493  | 0.32512236 | 0.41658636 |
| 23 | Ag | 0.88390526  | 0.44264171 | 0.30571807 |
| 24 | Ag | 0.77778000  | 0.55555999 | 0.19797000 |
| 25 | Ag | 1.00000000  | 0.66667002 | 0.09024000 |
| 26 | Ag | -0.00001188 | 0.66601439 | 0.41168289 |
| 27 | Ag | 0.22006958  | 0.77619691 | 0.30421250 |
| 28 | Ag | 0.11111000  | 0.88889003 | 0.19797000 |
| 29 | Ag | 0.33333000  | 0.66667002 | 0.09024000 |
| 30 | Ag | 0.32834337  | 0.66541362 | 0.41223779 |
| 31 | Ag | 0.55466243  | 0.77383456 | 0.30650778 |
| 32 | Ag | 0.44444001  | 0.88889003 | 0.19797000 |
| 33 | Ag | 0.66667002  | 0.66667002 | 0.09024000 |
| 34 | Ag | 0.66350997  | 0.67023559 | 0.41666483 |
| 35 | Ag | 0.88388962  | 0.77359771 | 0.30569892 |
| 36 | Ag | 0.77778000  | 0.88889003 | 0.19797000 |
| 37 | C  | 0.35904142  | 0.34441032 | 0.51276190 |
| 38 | O  | 0.62462700  | 0.47795331 | 0.49603968 |
| 39 | O  | 0.32257321  | 0.32535726 | 0.56355126 |
| 40 | H  | 0.70646406  | 0.51863060 | 0.53023371 |

|                     |             |            |             |
|---------------------|-------------|------------|-------------|
| Lattice vector 1[Å] | 8.77270031  | 0.00000000 | 0.00000000  |
| Lattice vector 2[Å] | -4.38635015 | 7.59738133 | 0.00000000  |
| Lattice vector 3[Å] | 0.00000000  | 0.00000000 | 22.16290092 |

### R5.CO\*+OH\*=cis-COOH\* on K/Ag (111)

| n° | atom | Relaxed atomic coordinates (cartesian) [Å] |             |            |
|----|------|--------------------------------------------|-------------|------------|
| 1  | Ag   | 0.00000000                                 | 0.00000000  | 0.09024000 |
| 2  | Ag   | -0.00326429                                | -0.00365075 | 0.41076021 |
| 3  | Ag   | 0.22421179                                 | 0.11425109  | 0.30690056 |
| 4  | Ag   | 0.11111000                                 | 0.22222000  | 0.19796999 |
| 5  | Ag   | 0.33333332                                 | 0.00000000  | 0.09024000 |
| 6  | Ag   | 0.33248299                                 | -0.00250121 | 0.41313811 |
| 7  | Ag   | 0.55456598                                 | 0.10958230  | 0.30520295 |
| 8  | Ag   | 0.44443998                                 | 0.22221999  | 0.19796999 |



|    |    |             |             |            |
|----|----|-------------|-------------|------------|
| 9  | Ag | 0.66666664  | 0.00000000  | 0.09024000 |
| 10 | Ag | 0.66593508  | -0.00239875 | 0.41341925 |
| 11 | Ag | 0.88821999  | 0.11093211  | 0.30473711 |
| 12 | Ag | 0.77777997  | 0.22221999  | 0.19796999 |
| 13 | Ag | 1.00000000  | 0.33333332  | 0.09024000 |
| 14 | Ag | 0.99565747  | 0.33046237  | 0.41328612 |
| 15 | Ag | 0.22278853  | 0.44201263  | 0.30749564 |
| 16 | Ag | 0.11111000  | 0.55555998  | 0.19796999 |
| 17 | Ag | 0.33333332  | 0.33333332  | 0.09024000 |
| 18 | Ag | 0.32811120  | 0.32980826  | 0.41981616 |
| 19 | Ag | 0.55282789  | 0.44327879  | 0.30815648 |
| 20 | Ag | 0.44443998  | 0.55555998  | 0.19796999 |
| 21 | Ag | 0.66666664  | 0.33333332  | 0.09024000 |
| 22 | Ag | 0.66749243  | 0.32822701  | 0.41240120 |
| 23 | Ag | 0.88845316  | 0.44399456  | 0.30516093 |
| 24 | Ag | 0.77777997  | 0.55555998  | 0.19797000 |
| 25 | Ag | 0.00000000  | 0.66666664  | 0.09024000 |
| 26 | Ag | -0.00059527 | 0.66522140  | 0.41335774 |
| 27 | Ag | 0.22119102  | 0.77719051  | 0.30490631 |
| 28 | Ag | 0.11111000  | 0.88888997  | 0.19796999 |
| 29 | Ag | 0.33333332  | 0.66666664  | 0.09024000 |
| 30 | Ag | 0.33109124  | 0.66807793  | 0.41283503 |
| 31 | Ag | 0.55553045  | 0.77487894  | 0.30684666 |
| 32 | Ag | 0.44443998  | 0.88888997  | 0.19796999 |
| 33 | Ag | 0.66666664  | 0.66666664  | 0.09024000 |
| 34 | Ag | 0.66617654  | 0.66290188  | 0.41769754 |
| 35 | Ag | 0.88519629  | 0.77397471  | 0.30571554 |
| 36 | Ag | 0.77777997  | 0.88888997  | 0.19796999 |
| 37 | C  | 0.36103961  | 0.36879741  | 0.51844757 |
| 38 | O  | 0.59425415  | 0.56193835  | 0.53016188 |
| 39 | O  | 0.29450252  | 0.30887513  | 0.56518522 |
| 40 | H  | 0.64895359  | 0.48944836  | 0.53632691 |
| 41 | K  | 0.82753034  | 0.88491009  | 0.55294146 |

|                     |             |            |             |
|---------------------|-------------|------------|-------------|
| Lattice vector 1[Å] | 8.77270031  | 0.00000000 | 0.00000000  |
| Lattice vector 2[Å] | -4.38635015 | 7.59738133 | 0.00000000  |
| Lattice vector 3[Å] | 0.00000000  | 0.00000000 | 22.16290092 |

**R6. cis-COOH\*= $\rightarrow$ trans-COOH\* on Ag (111)**

| n° | atom | Relaxed atomic coordinates (cartesian) [Å] |            |            |
|----|------|--------------------------------------------|------------|------------|
| 1  | Ag   | 0.00000000                                 | 0.00000000 | 0.09024000 |
| 2  | Ag   | 0.99902256                                 | 0.99738100 | 0.41254913 |
| 3  | Ag   | 0.22401462                                 | 0.11383989 | 0.30676959 |

|    |    |            |            |            |
|----|----|------------|------------|------------|
| 4  | Ag | 0.11111000 | 0.22221999 | 0.19797000 |
| 5  | Ag | 0.33333332 | 0.00000000 | 0.09024000 |
| 6  | Ag | 0.33446992 | 0.99903949 | 0.41287883 |
| 7  | Ag | 0.55532585 | 0.11098922 | 0.30520769 |
| 8  | Ag | 0.44443998 | 0.22221999 | 0.19797000 |
| 9  | Ag | 0.66666664 | 0.00000000 | 0.09024000 |
| 10 | Ag | 0.66690891 | 0.99903350 | 0.41293800 |
| 11 | Ag | 0.89024930 | 0.11153692 | 0.30566574 |
| 12 | Ag | 0.77777997 | 0.22221999 | 0.19796999 |
| 13 | Ag | 1.00000000 | 0.33333332 | 0.09024000 |
| 14 | Ag | 0.99765351 | 0.33195262 | 0.41302831 |
| 15 | Ag | 0.22280638 | 0.44329557 | 0.30636973 |
| 16 | Ag | 0.11111000 | 0.55555998 | 0.19796999 |
| 17 | Ag | 0.33333332 | 0.33333332 | 0.09024000 |
| 18 | Ag | 0.33536548 | 0.33348710 | 0.41801970 |
| 19 | Ag | 0.55383514 | 0.44326271 | 0.30644427 |
| 20 | Ag | 0.44443998 | 0.55555998 | 0.19796999 |
| 21 | Ag | 0.66666664 | 0.33333332 | 0.09024000 |
| 22 | Ag | 0.66875208 | 0.33207837 | 0.41232483 |
| 23 | Ag | 0.88981164 | 0.44436711 | 0.30548094 |
| 24 | Ag | 0.77777997 | 0.55555998 | 0.19796999 |
| 25 | Ag | 0.00000000 | 0.66666664 | 0.09024000 |
| 26 | Ag | 0.00088195 | 0.66606369 | 0.41294666 |
| 27 | Ag | 0.22255111 | 0.77740425 | 0.30554292 |
| 28 | Ag | 0.11111000 | 0.88888997 | 0.19796999 |
| 29 | Ag | 0.33333332 | 0.66666664 | 0.09024000 |
| 30 | Ag | 0.33441976 | 0.66790464 | 0.41289570 |
| 31 | Ag | 0.55539037 | 0.77643604 | 0.30560394 |
| 32 | Ag | 0.44443998 | 0.88888997 | 0.19797000 |
| 33 | Ag | 0.66666664 | 0.66666664 | 0.09024000 |
| 34 | Ag | 0.66955798 | 0.66802540 | 0.41318311 |
| 35 | Ag | 0.88893154 | 0.77704329 | 0.30538858 |
| 36 | Ag | 0.77777997 | 0.88888997 | 0.19796999 |
| 37 | C  | 0.31137768 | 0.36592393 | 0.51432908 |
| 38 | O  | 0.17297850 | 0.31716977 | 0.53994028 |
| 39 | O  | 0.47190385 | 0.45728717 | 0.54559407 |
| 40 | H  | 0.50542903 | 0.37373525 | 0.56117260 |

|                     |             |            |             |
|---------------------|-------------|------------|-------------|
| Lattice vector 1[Å] | 8.77270031  | 0.00000000 | 0.00000000  |
| Lattice vector 2[Å] | -4.38635015 | 7.59738133 | 0.00000000  |
| Lattice vector 3[Å] | 0.00000000  | 0.00000000 | 22.16290092 |

**R6. cis-COOH\*= $\rightarrow$ trans-COOH\* on K/Ag (111)**

| n° | atom | Relaxed atomic coordinates (cartesian) [Å] |            |            |
|----|------|--------------------------------------------|------------|------------|
| 1  | Ag   | 0.00000000                                 | 0.00000000 | 0.09024000 |
| 2  | Ag   | 0.99822531                                 | 0.99851787 | 0.41374076 |
| 3  | Ag   | 0.22474235                                 | 0.11499885 | 0.30844402 |
| 4  | Ag   | 0.11111000                                 | 0.22221999 | 0.19797000 |
| 5  | Ag   | 0.33333332                                 | 0.00000000 | 0.09024000 |
| 6  | Ag   | 0.33446667                                 | 0.99791029 | 0.41402493 |
| 7  | Ag   | 0.55562742                                 | 0.11163918 | 0.30589760 |
| 8  | Ag   | 0.44443998                                 | 0.22221999 | 0.19797000 |
| 9  | Ag   | 0.66666664                                 | 0.00000000 | 0.09024000 |
| 10 | Ag   | 0.66812131                                 | 0.00053954 | 0.41371086 |
| 11 | Ag   | 0.88961338                                 | 0.11021049 | 0.30458461 |
| 12 | Ag   | 0.77777997                                 | 0.22221999 | 0.19796999 |
| 13 | Ag   | 1.00000000                                 | 0.33333332 | 0.09024000 |
| 14 | Ag   | 0.99959237                                 | 0.33399521 | 0.40895877 |
| 15 | Ag   | 0.22665854                                 | 0.44380870 | 0.30697526 |
| 16 | Ag   | 0.11111000                                 | 0.55555998 | 0.19796999 |
| 17 | Ag   | 0.33333332                                 | 0.33333332 | 0.09024000 |
| 18 | Ag   | 0.33393746                                 | 0.33185959 | 0.42533589 |
| 19 | Ag   | 0.55288642                                 | 0.44278510 | 0.30846869 |
| 20 | Ag   | 0.44443998                                 | 0.55555998 | 0.19796999 |
| 21 | Ag   | 0.66666664                                 | 0.33333332 | 0.09024000 |
| 22 | Ag   | 0.67049878                                 | 0.33326204 | 0.41395805 |
| 23 | Ag   | 0.88861715                                 | 0.44594451 | 0.30429293 |
| 24 | Ag   | 0.77777997                                 | 0.55555998 | 0.19796999 |
| 25 | Ag   | 0.00000000                                 | 0.66666664 | 0.09024000 |
| 26 | Ag   | 1.00034969                                 | 0.66601621 | 0.41410840 |
| 27 | Ag   | 0.22238520                                 | 0.77788673 | 0.30579624 |
| 28 | Ag   | 0.11111000                                 | 0.88888997 | 0.19796999 |
| 29 | Ag   | 0.33333332                                 | 0.66666664 | 0.09024000 |
| 30 | Ag   | 0.33463846                                 | 0.66782983 | 0.41366823 |
| 31 | Ag   | 0.55618229                                 | 0.77770092 | 0.30579726 |
| 32 | Ag   | 0.44443998                                 | 0.88888997 | 0.19796999 |
| 33 | Ag   | 0.66666664                                 | 0.66666664 | 0.09024000 |
| 34 | Ag   | 0.66900162                                 | 0.66901785 | 0.41400210 |
| 35 | Ag   | 0.88984880                                 | 0.77789350 | 0.30569806 |
| 36 | Ag   | 0.77777997                                 | 0.88888997 | 0.19796999 |
| 37 | C    | 0.33159001                                 | 0.32553508 | 0.52481398 |
| 38 | O    | 0.21597863                                 | 0.31268844 | 0.55895967 |
| 39 | O    | 0.48551709                                 | 0.33847047 | 0.55369835 |
| 40 | H    | 0.56592032                                 | 0.46363360 | 0.56136442 |
| 41 | K    | 0.89541962                                 | 0.26401978 | 0.55145302 |

|                     |             |            |             |
|---------------------|-------------|------------|-------------|
| Lattice vector 1[Å] | 8.77270031  | 0.00000000 | 0.00000000  |
| Lattice vector 2[Å] | -4.38635015 | 7.59738133 | 0.00000000  |
| Lattice vector 3[Å] | 0.00000000  | 0.00000000 | 22.16290092 |

**R7.COOH\*=CO<sub>2</sub>\*+ H\* on Ag (111)**

| n° | atom | Relaxed atomic coordinates (cartesian) [Å] |            |            |
|----|------|--------------------------------------------|------------|------------|
| 1  | Ag   | 0.00000000                                 | 0.00000000 | 0.09024000 |
| 2  | Ag   | 0.99911259                                 | 0.99959037 | 0.41321423 |
| 3  | Ag   | 0.22214645                                 | 0.11151731 | 0.30505406 |
| 4  | Ag   | 0.11111000                                 | 0.22222000 | 0.19797000 |
| 5  | Ag   | 0.33333001                                 | 0.00000000 | 0.09024000 |
| 6  | Ag   | 0.33213994                                 | 0.99979418 | 0.41337260 |
| 7  | Ag   | 0.55585804                                 | 0.11267547 | 0.30631918 |
| 8  | Ag   | 0.44444001                                 | 0.22222000 | 0.19797000 |
| 9  | Ag   | 0.66667002                                 | 0.00000000 | 0.09024000 |
| 10 | Ag   | 0.66638350                                 | 1.00097071 | 0.41314926 |
| 11 | Ag   | 0.88924633                                 | 0.11206487 | 0.30579991 |
| 12 | Ag   | 0.77778000                                 | 0.22222000 | 0.19797000 |
| 13 | Ag   | 1.00000000                                 | 0.33333001 | 0.09024000 |
| 14 | Ag   | 0.99921052                                 | 0.33397084 | 0.41337845 |
| 15 | Ag   | 0.22216235                                 | 0.44516036 | 0.30497047 |
| 16 | Ag   | 0.11111000                                 | 0.55555999 | 0.19797000 |
| 17 | Ag   | 0.33333001                                 | 0.33333001 | 0.09024000 |
| 18 | Ag   | 0.33200147                                 | 0.33378644 | 0.41163818 |
| 19 | Ag   | 0.55556480                                 | 0.44515500 | 0.30503572 |
| 20 | Ag   | 0.44444001                                 | 0.55555999 | 0.19797000 |
| 21 | Ag   | 0.66667002                                 | 0.33333001 | 0.09024000 |
| 22 | Ag   | 0.66171481                                 | 0.33475256 | 0.41662231 |
| 23 | Ag   | 0.88732303                                 | 0.44389685 | 0.30679422 |
| 24 | Ag   | 0.77778000                                 | 0.55555999 | 0.19797000 |
| 25 | Ag   | 1.00000000                                 | 0.66667002 | 0.09024000 |
| 26 | Ag   | -0.00067113                                | 0.66688566 | 0.41355068 |
| 27 | Ag   | 0.22252216                                 | 0.77835386 | 0.30606083 |
| 28 | Ag   | 0.11111000                                 | 0.88889003 | 0.19797000 |
| 29 | Ag   | 0.33333001                                 | 0.66667002 | 0.09024000 |
| 30 | Ag   | 0.33256897                                 | 0.66701230 | 0.41361193 |
| 31 | Ag   | 0.55553314                                 | 0.77768108 | 0.30625330 |
| 32 | Ag   | 0.44444001                                 | 0.88889003 | 0.19797000 |
| 33 | Ag   | 0.66667002                                 | 0.66667002 | 0.09024000 |
| 34 | Ag   | 0.66438481                                 | 0.66502877 | 0.41473061 |
| 35 | Ag   | 0.88800994                                 | 0.77788792 | 0.30624753 |
| 36 | Ag   | 0.77778000                                 | 0.88889003 | 0.19797000 |

|    |   |            |            |            |
|----|---|------------|------------|------------|
| 37 | C | 0.24296023 | 0.36137624 | 0.53581406 |
| 38 | O | 0.11388361 | 0.34479683 | 0.55870122 |
| 39 | O | 0.39373481 | 0.38289813 | 0.54067439 |
| 40 | H | 0.45573938 | 0.38779729 | 0.48726697 |

|                     |             |            |             |
|---------------------|-------------|------------|-------------|
| Lattice vector 1[Å] | 8.77270031  | 0.00000000 | 0.00000000  |
| Lattice vector 2[Å] | -4.38635015 | 7.59738133 | 0.00000000  |
| Lattice vector 3[Å] | 0.00000000  | 0.00000000 | 22.16290092 |

### R7. COOH\* = CO<sub>2</sub>\* + H\* on K/Ag (111)

| n° | atom | Relaxed atomic coordinates (cartesian) [Å] |             |            |
|----|------|--------------------------------------------|-------------|------------|
| 1  | Ag   | 0.00000000                                 | 0.00000000  | 0.09024000 |
| 2  | Ag   | 0.99266166                                 | 0.99481603  | 0.41333027 |
| 3  | Ag   | 0.22119262                                 | 0.11236273  | 0.30739489 |
| 4  | Ag   | 0.11111000                                 | 0.22222000  | 0.19797000 |
| 5  | Ag   | 0.33333001                                 | 0.00000000  | 0.09024000 |
| 6  | Ag   | 0.33069075                                 | -0.00118604 | 0.41382900 |
| 7  | Ag   | 0.55406272                                 | 0.11192894  | 0.30642747 |
| 8  | Ag   | 0.44444001                                 | 0.22222000  | 0.19797000 |
| 9  | Ag   | 0.66667002                                 | 0.00000000  | 0.09024000 |
| 10 | Ag   | 0.66410370                                 | 0.99795040  | 0.41285255 |
| 11 | Ag   | 0.88694940                                 | 0.10924943  | 0.30456759 |
| 12 | Ag   | 0.77778000                                 | 0.22222000  | 0.19797000 |
| 13 | Ag   | 1.00000000                                 | 0.33333001  | 0.09024000 |
| 14 | Ag   | 0.99367017                                 | 0.33246570  | 0.40894172 |
| 15 | Ag   | 0.22240162                                 | 0.44309170  | 0.30594430 |
| 16 | Ag   | 0.11111000                                 | 0.55555999  | 0.19797000 |
| 17 | Ag   | 0.33333001                                 | 0.33333001  | 0.09024000 |
| 18 | Ag   | 0.31686067                                 | 0.32665227  | 0.42168542 |
| 19 | Ag   | 0.55002978                                 | 0.44135591  | 0.30725784 |
| 20 | Ag   | 0.44444001                                 | 0.55555999  | 0.19797000 |
| 21 | Ag   | 0.66667002                                 | 0.33333001  | 0.09024000 |
| 22 | Ag   | 0.66683614                                 | 0.33555751  | 0.41578485 |
| 23 | Ag   | 0.88620362                                 | 0.44425101  | 0.30427899 |
| 24 | Ag   | 0.77778000                                 | 0.55555999  | 0.19797000 |
| 25 | Ag   | 1.00000000                                 | 0.66667002  | 0.09024000 |
| 26 | Ag   | -0.00112658                                | 0.66552909  | 0.41423769 |
| 27 | Ag   | 0.22046007                                 | 0.77684604  | 0.30648163 |
| 28 | Ag   | 0.11111000                                 | 0.88889003  | 0.19797000 |
| 29 | Ag   | 0.33333001                                 | 0.66667002  | 0.09024000 |
| 30 | Ag   | 0.33089894                                 | 0.66534951  | 0.41382519 |
| 31 | Ag   | 0.55418282                                 | 0.77466300  | 0.30674200 |
| 32 | Ag   | 0.44444001                                 | 0.88889003  | 0.19797000 |

|    |    |            |            |            |
|----|----|------------|------------|------------|
| 33 | Ag | 0.66667002 | 0.66667002 | 0.09024000 |
| 34 | Ag | 0.66506027 | 0.66043574 | 0.41679682 |
| 35 | Ag | 0.88656002 | 0.77641652 | 0.30592220 |
| 36 | Ag | 0.77778000 | 0.88889003 | 0.19797000 |
| 37 | C  | 0.35054260 | 0.35345019 | 0.52344542 |
| 38 | O  | 0.22474960 | 0.30991957 | 0.55821245 |
| 39 | O  | 0.51241658 | 0.41494040 | 0.53531708 |
| 40 | H  | 0.61229059 | 0.45794418 | 0.47547502 |
| 41 | K  | 0.90514248 | 0.24107415 | 0.55291931 |

|                     |             |            |             |
|---------------------|-------------|------------|-------------|
| Lattice vector 1[Å] | 8.77270031  | 0.00000000 | 0.00000000  |
| Lattice vector 2[Å] | -4.38635015 | 7.59738133 | 0.00000000  |
| Lattice vector 3[Å] | 0.00000000  | 0.00000000 | 22.16290092 |

### R10.CO\*+O\*= CO<sub>2</sub>\* on Ag (111)

| n° | atom | Relaxed atomic coordinates (cartesian) [Å] |            |            |
|----|------|--------------------------------------------|------------|------------|
| 1  | Ag   | 0.00000000                                 | 0.00000000 | 0.09024000 |
| 2  | Ag   | 0.99759970                                 | 1.00100769 | 0.41201654 |
| 3  | Ag   | 0.22291513                                 | 0.11403343 | 0.30702028 |
| 4  | Ag   | 0.11111000                                 | 0.22222000 | 0.19797000 |
| 5  | Ag   | 0.33333001                                 | 0.00000000 | 0.09024000 |
| 6  | Ag   | 0.32302454                                 | 0.99122631 | 0.41243232 |
| 7  | Ag   | 0.55400169                                 | 0.11245608 | 0.30539237 |
| 8  | Ag   | 0.44444001                                 | 0.22222000 | 0.19797000 |
| 9  | Ag   | 0.66667002                                 | 0.00000000 | 0.09024000 |
| 10 | Ag   | 0.66225631                                 | 0.99830224 | 0.41078605 |
| 11 | Ag   | 0.88694575                                 | 0.11041425 | 0.30485752 |
| 12 | Ag   | 0.77778000                                 | 0.22222000 | 0.19797000 |
| 13 | Ag   | 1.00000000                                 | 0.33333001 | 0.09024000 |
| 14 | Ag   | 0.99761290                                 | 0.33101815 | 0.41201917 |
| 15 | Ag   | 0.22291030                                 | 0.44283802 | 0.30702481 |
| 16 | Ag   | 0.11111000                                 | 0.55555999 | 0.19797000 |
| 17 | Ag   | 0.33333001                                 | 0.33333001 | 0.09024000 |
| 18 | Ag   | 0.32614300                                 | 0.33022219 | 0.41902234 |
| 19 | Ag   | 0.55374234                                 | 0.44382049 | 0.30763655 |
| 20 | Ag   | 0.44444001                                 | 0.55555999 | 0.19797000 |
| 21 | Ag   | 0.66667002                                 | 0.33333001 | 0.09024000 |
| 22 | Ag   | 0.66029557                                 | 0.31481842 | 0.41337690 |
| 23 | Ag   | 0.88738021                                 | 0.44479418 | 0.30634481 |
| 24 | Ag   | 0.77778000                                 | 0.55555999 | 0.19797000 |
| 25 | Ag   | 1.00000000                                 | 0.66667002 | 0.09024000 |
| 26 | Ag   | -0.01382103                                | 0.66032232 | 0.41983229 |
| 27 | Ag   | 0.21441930                                 | 0.77420776 | 0.30622709 |

|    |    |            |            |            |
|----|----|------------|------------|------------|
| 28 | Ag | 0.11111000 | 0.88889003 | 0.19797000 |
| 29 | Ag | 0.33333001 | 0.66667002 | 0.09024000 |
| 30 | Ag | 0.32301662 | 0.66620228 | 0.41245002 |
| 31 | Ag | 0.55393566 | 0.77549353 | 0.30537277 |
| 32 | Ag | 0.44444001 | 0.88889003 | 0.19797000 |
| 33 | Ag | 0.66667002 | 0.66667002 | 0.09024000 |
| 34 | Ag | 0.66027835 | 0.67986315 | 0.41329106 |
| 35 | Ag | 0.88740076 | 0.77653924 | 0.30634237 |
| 36 | Ag | 0.77778000 | 0.88889003 | 0.19797000 |
| 37 | O  | 0.69649049 | 0.51557080 | 0.47617901 |
| 38 | O  | 0.42648017 | 0.38058083 | 0.56388888 |
| 39 | C  | 0.42807542 | 0.38136271 | 0.51170509 |

|                     |             |            |             |
|---------------------|-------------|------------|-------------|
| Lattice vector 1[Å] | 8.77270031  | 0.00000000 | 0.00000000  |
| Lattice vector 2[Å] | -4.38635015 | 7.59738133 | 0.00000000  |
| Lattice vector 3[Å] | 0.00000000  | 0.00000000 | 22.16290092 |

### R10.CO\*+O\*=CO<sub>2</sub>\* on K/Ag (111)

| n° | atom | Relaxed atomic coordinates (cartesian) [Å] |             |            |
|----|------|--------------------------------------------|-------------|------------|
| 1  | Ag   | 0.00000000                                 | 0.00000000  | 0.09024000 |
| 2  | Ag   | 0.99984173                                 | 0.00138366  | 0.41082542 |
| 3  | Ag   | 0.22409059                                 | 0.11389312  | 0.30647361 |
| 4  | Ag   | 0.11111000                                 | 0.22222000  | 0.19797000 |
| 5  | Ag   | 0.33333001                                 | 0.00000000  | 0.09024000 |
| 6  | Ag   | 0.32817363                                 | -0.00599556 | 0.41247266 |
| 7  | Ag   | 0.55562280                                 | 0.11339389  | 0.30609094 |
| 8  | Ag   | 0.44444001                                 | 0.22222000  | 0.19797000 |
| 9  | Ag   | 0.66667002                                 | 0.00000000  | 0.09024000 |
| 10 | Ag   | 0.66519829                                 | -0.00186849 | 0.41204451 |
| 11 | Ag   | 0.88739495                                 | 0.11028605  | 0.30442584 |
| 12 | Ag   | 0.77778000                                 | 0.22222000  | 0.19797000 |
| 13 | Ag   | 1.00000000                                 | 0.33333001  | 0.09024000 |
| 14 | Ag   | 0.99974206                                 | 0.32916481  | 0.41210516 |
| 15 | Ag   | 0.22342427                                 | 0.44175329  | 0.30708186 |
| 16 | Ag   | 0.11111000                                 | 0.55556000  | 0.19797000 |
| 17 | Ag   | 0.33333001                                 | 0.33333001  | 0.09024000 |
| 18 | Ag   | 0.33001778                                 | 0.32998531  | 0.41826456 |
| 19 | Ag   | 0.55382995                                 | 0.44234339  | 0.30727186 |
| 20 | Ag   | 0.44444001                                 | 0.55556000  | 0.19797000 |
| 21 | Ag   | 0.66667002                                 | 0.33333001  | 0.09024000 |
| 22 | Ag   | 0.66349815                                 | 0.31616796  | 0.41542104 |
| 23 | Ag   | 0.88792990                                 | 0.44311590  | 0.30591641 |
| 24 | Ag   | 0.77778000                                 | 0.55556000  | 0.19797000 |

|    |    |            |            |            |
|----|----|------------|------------|------------|
| 25 | Ag | 1.00000000 | 0.66667002 | 0.09024000 |
| 26 | Ag | 0.00194036 | 0.66526358 | 0.41540995 |
| 27 | Ag | 0.21640993 | 0.77426091 | 0.30557848 |
| 28 | Ag | 0.11111000 | 0.88889003 | 0.19797000 |
| 29 | Ag | 0.33333001 | 0.66667002 | 0.09024000 |
| 30 | Ag | 0.32863624 | 0.66576984 | 0.41213385 |
| 31 | Ag | 0.55500235 | 0.77517769 | 0.30504284 |
| 32 | Ag | 0.44444001 | 0.88889003 | 0.19797000 |
| 33 | Ag | 0.66667002 | 0.66667002 | 0.09024000 |
| 34 | Ag | 0.66134000 | 0.67708225 | 0.41204198 |
| 35 | Ag | 0.88829466 | 0.77660443 | 0.30502394 |
| 36 | Ag | 0.77778000 | 0.88889003 | 0.19797000 |
| 37 | O  | 0.75415585 | 0.54591587 | 0.47558455 |
| 38 | O  | 0.44644221 | 0.38712785 | 0.56349680 |
| 39 | C  | 0.43716567 | 0.38153026 | 0.51121192 |
| 40 | K  | 0.88067640 | 0.77627453 | 0.55115515 |

|                     |             |            |             |
|---------------------|-------------|------------|-------------|
| Lattice vector 1[Å] | 8.77270031  | 0.00000000 | 0.00000000  |
| Lattice vector 2[Å] | -4.38635015 | 7.59738133 | 0.00000000  |
| Lattice vector 3[Å] | 0.00000000  | 0.00000000 | 22.16290092 |

### R11.CO\*+H\*=CHO\* on Ag (111)

| n° | atom | Relaxed atomic coordinates (cartesian) [Å] |            |            |
|----|------|--------------------------------------------|------------|------------|
| 1  | Ag   | 0.00000000                                 | 0.00000000 | 0.09024000 |
| 2  | Ag   | 0.98506124                                 | 0.98979491 | 0.41310092 |
| 3  | Ag   | 0.21725191                                 | 0.11018471 | 0.30621088 |
| 4  | Ag   | 0.11111000                                 | 0.22222000 | 0.19797000 |
| 5  | Ag   | 0.33333001                                 | 0.00000000 | 0.09024000 |
| 6  | Ag   | 0.32520933                                 | 0.99581533 | 0.41261314 |
| 7  | Ag   | 0.55196532                                 | 0.11172724 | 0.30678848 |
| 8  | Ag   | 0.44444001                                 | 0.22222000 | 0.19797000 |
| 9  | Ag   | 0.66667002                                 | 0.00000000 | 0.09024000 |
| 10 | Ag   | 0.65688785                                 | 0.99570756 | 0.41372445 |
| 11 | Ag   | 0.88359545                                 | 0.10900368 | 0.30538240 |
| 12 | Ag   | 0.77778000                                 | 0.22222000 | 0.19797000 |
| 13 | Ag   | 1.00000000                                 | 0.33333001 | 0.09024000 |
| 14 | Ag   | 0.98489132                                 | 0.32984599 | 0.41309601 |
| 15 | Ag   | 0.21722052                                 | 0.44152674 | 0.30611074 |
| 16 | Ag   | 0.11111000                                 | 0.55555999 | 0.19797000 |
| 17 | Ag   | 0.33333001                                 | 0.33333001 | 0.09024000 |
| 18 | Ag   | 0.29798083                                 | 0.31683224 | 0.41506565 |
| 19 | Ag   | 0.54704693                                 | 0.44064962 | 0.30704589 |
| 20 | Ag   | 0.44444001                                 | 0.55555999 | 0.19797000 |



|    |    |             |            |            |
|----|----|-------------|------------|------------|
| 21 | Ag | 0.66667002  | 0.33333000 | 0.09024000 |
| 22 | Ag | 0.66457623  | 0.33403931 | 0.41554778 |
| 23 | Ag | 0.88346907  | 0.44282712 | 0.30531461 |
| 24 | Ag | 0.77778000  | 0.55555999 | 0.19797000 |
| 25 | Ag | 1.00000000  | 0.66667002 | 0.09024000 |
| 26 | Ag | -0.00343309 | 0.66562587 | 0.41299895 |
| 27 | Ag | 0.21817448  | 0.77620923 | 0.30493080 |
| 28 | Ag | 0.11111000  | 0.88889003 | 0.19797000 |
| 29 | Ag | 0.33333001  | 0.66667002 | 0.09024000 |
| 30 | Ag | 0.32539188  | 0.66417494 | 0.41264387 |
| 31 | Ag | 0.55191930  | 0.77462657 | 0.30670074 |
| 32 | Ag | 0.44444001  | 0.88889003 | 0.19797000 |
| 33 | Ag | 0.66667002  | 0.66667002 | 0.09024000 |
| 34 | Ag | 0.66432506  | 0.66476777 | 0.41524439 |
| 35 | Ag | 0.88355944  | 0.77493949 | 0.30526802 |
| 36 | Ag | 0.77778000  | 0.88889003 | 0.19797000 |
| 37 | O  | 0.40858269  | 0.37903754 | 0.55765079 |
| 38 | C  | 0.41086492  | 0.37510503 | 0.50451166 |
| 39 | H  | 0.58244087  | 0.45408781 | 0.47588624 |

|                     |             |            |             |
|---------------------|-------------|------------|-------------|
| Lattice vector 1[Å] | 8.77270031  | 0.00000000 | 0.00000000  |
| Lattice vector 2[Å] | -4.38635015 | 7.59738133 | 0.00000000  |
| Lattice vector 3[Å] | 0.00000000  | 0.00000000 | 22.16290092 |

### R11.CO\*+H\*=CHO\* on K/Ag (111)

| n° | atom | Relaxed atomic coordinates (cartesian) [Å] |             |            |
|----|------|--------------------------------------------|-------------|------------|
| 1  | Ag   | 0.00000000                                 | 0.00000000  | 0.09024000 |
| 2  | Ag   | 0.98933964                                 | -0.00557670 | 0.41283449 |
| 3  | Ag   | 0.22053353                                 | 0.11266121  | 0.30669578 |
| 4  | Ag   | 0.11111000                                 | 0.22222000  | 0.19797000 |
| 5  | Ag   | 0.33333001                                 | 0.00000000  | 0.09024000 |
| 6  | Ag   | 0.32893983                                 | -0.00113557 | 0.41326968 |
| 7  | Ag   | 0.55526414                                 | 0.11444671  | 0.30771702 |
| 8  | Ag   | 0.44444001                                 | 0.22222000  | 0.19797000 |
| 9  | Ag   | 0.66667002                                 | 0.00000000  | 0.09024000 |
| 10 | Ag   | 0.66162066                                 | 0.00052836  | 0.41390214 |
| 11 | Ag   | 0.88580193                                 | 0.10997837  | 0.30432507 |
| 12 | Ag   | 0.77778000                                 | 0.22222000  | 0.19797000 |
| 13 | Ag   | 1.00000000                                 | 0.33333001  | 0.09024000 |
| 14 | Ag   | 0.98752076                                 | 0.33542659  | 0.40928874 |
| 15 | Ag   | 0.22130305                                 | 0.44408682  | 0.30543364 |
| 16 | Ag   | 0.11111000                                 | 0.55555999  | 0.19797000 |
| 17 | Ag   | 0.33333001                                 | 0.33333001  | 0.09024000 |

|    |    |             |            |            |
|----|----|-------------|------------|------------|
| 18 | Ag | 0.30706475  | 0.32747810 | 0.41544506 |
| 19 | Ag | 0.55071767  | 0.44187235 | 0.31009787 |
| 20 | Ag | 0.44444001  | 0.55555999 | 0.19797000 |
| 21 | Ag | 0.66667002  | 0.33333001 | 0.09024000 |
| 22 | Ag | 0.66358075  | 0.33793664 | 0.42577298 |
| 23 | Ag | 0.88153668  | 0.44466456 | 0.30583919 |
| 24 | Ag | 0.77778000  | 0.55555999 | 0.19797000 |
| 25 | Ag | 1.00000000  | 0.66667002 | 0.09024000 |
| 26 | Ag | -0.00172923 | 0.66944631 | 0.41406461 |
| 27 | Ag | 0.22039957  | 0.77795358 | 0.30513566 |
| 28 | Ag | 0.11111000  | 0.88889003 | 0.19797000 |
| 29 | Ag | 0.33333001  | 0.66667002 | 0.09024000 |
| 30 | Ag | 0.32995331  | 0.67001615 | 0.41304191 |
| 31 | Ag | 0.55417816  | 0.77700948 | 0.30634502 |
| 32 | Ag | 0.44444001  | 0.88889003 | 0.19797000 |
| 33 | Ag | 0.66667002  | 0.66667002 | 0.09024000 |
| 34 | Ag | 0.66434362  | 0.66922328 | 0.41677466 |
| 35 | Ag | 0.88480810  | 0.77597924 | 0.30570599 |
| 36 | Ag | 0.77778000  | 0.88889003 | 0.19797000 |
| 37 | O  | 0.31360061  | 0.32886655 | 0.56359753 |
| 38 | C  | 0.34947063  | 0.34222601 | 0.51180619 |
| 39 | H  | 0.57086421  | 0.39698265 | 0.48939703 |
| 40 | K  | 0.91027537  | 0.18290655 | 0.54649656 |

|                     |             |            |             |
|---------------------|-------------|------------|-------------|
| Lattice vector 1[Å] | 8.77270031  | 0.00000000 | 0.00000000  |
| Lattice vector 2[Å] | -4.38635015 | 7.59738133 | 0.00000000  |
| Lattice vector 3[Å] | 0.00000000  | 0.00000000 | 22.16290092 |

### R12.CHO\*+O\*=HCOO\* on /Ag (111)

| n° | atom | Relaxed atomic coordinates (cartesian) [Å] |             |            |
|----|------|--------------------------------------------|-------------|------------|
| 1  | Ag   | 0.00000000                                 | 0.00000000  | 0.09024000 |
| 2  | Ag   | 0.01062369                                 | 0.00629876  | 0.41571014 |
| 3  | Ag   | 0.21593662                                 | 0.10928641  | 0.30597431 |
| 4  | Ag   | 0.11111000                                 | 0.22222000  | 0.19797000 |
| 5  | Ag   | 0.33333001                                 | 0.00000000  | 0.09024000 |
| 6  | Ag   | 0.32971511                                 | -0.00075817 | 0.41150754 |
| 7  | Ag   | 0.55424423                                 | 0.10769112  | 0.30562492 |
| 8  | Ag   | 0.44444001                                 | 0.22222000  | 0.19797000 |
| 9  | Ag   | 0.66667002                                 | 0.00000000  | 0.09024000 |
| 10 | Ag   | 0.65652751                                 | 0.00518107  | 0.41546551 |
| 11 | Ag   | 0.88591838                                 | 0.10910357  | 0.30602292 |
| 12 | Ag   | 0.77778000                                 | 0.22222000  | 0.19797000 |
| 13 | Ag   | 1.00000000                                 | 0.33333001  | 0.09024000 |

|    |    |             |            |            |
|----|----|-------------|------------|------------|
| 14 | Ag | -0.00380664 | 0.33336301 | 0.41116110 |
| 15 | Ag | 0.22032815  | 0.44294801 | 0.30554364 |
| 16 | Ag | 0.11111000  | 0.55556000 | 0.19797000 |
| 17 | Ag | 0.33333001  | 0.33333001 | 0.09024000 |
| 18 | Ag | 0.33153532  | 0.33021623 | 0.41293130 |
| 19 | Ag | 0.55484188  | 0.44728698 | 0.30554496 |
| 20 | Ag | 0.44444001  | 0.55555999 | 0.19797000 |
| 21 | Ag | 0.66667002  | 0.33333001 | 0.09024000 |
| 22 | Ag | 0.66405225  | 0.33028361 | 0.41093284 |
| 23 | Ag | 0.88553150  | 0.44321985 | 0.30487831 |
| 24 | Ag | 0.77778000  | 0.55555999 | 0.19797000 |
| 25 | Ag | 1.00000000  | 0.66667002 | 0.09024000 |
| 26 | Ag | 0.99442790  | 0.66336139 | 0.41111539 |
| 27 | Ag | 0.21948320  | 0.77785678 | 0.30451061 |
| 28 | Ag | 0.11111000  | 0.88889003 | 0.19797000 |
| 29 | Ag | 0.33333001  | 0.66667002 | 0.09024000 |
| 30 | Ag | 0.32017115  | 0.66724623 | 0.41053878 |
| 31 | Ag | 0.55288457  | 0.77585808 | 0.30715779 |
| 32 | Ag | 0.44444001  | 0.88889003 | 0.19797000 |
| 33 | Ag | 0.66667002  | 0.66667002 | 0.09024000 |
| 34 | Ag | 0.65138450  | 0.64661802 | 0.42122496 |
| 35 | Ag | 0.88183996  | 0.77565976 | 0.30721873 |
| 36 | Ag | 0.77778000  | 0.88889003 | 0.19797000 |
| 37 | C  | 0.51007924  | 0.57082593 | 0.50746279 |
| 38 | O  | 0.39857699  | 0.60612587 | 0.52237066 |
| 39 | O  | 0.77863236  | 0.89391297 | 0.47058555 |
| 40 | H  | 0.58412334  | 0.53970214 | 0.54148295 |

|                     |             |            |             |
|---------------------|-------------|------------|-------------|
| Lattice vector 1[Å] | 8.77270031  | 0.00000000 | 0.00000000  |
| Lattice vector 2[Å] | -4.38635015 | 7.59738133 | 0.00000000  |
| Lattice vector 3[Å] | 0.00000000  | 0.00000000 | 22.16290092 |

**R12.CHO\*+O\*=HCOO\* on K/Ag (111)**

| n° | atom | Relaxed atomic coordinates (cartesian) [Å] |             |            |
|----|------|--------------------------------------------|-------------|------------|
| 1  | Ag   | 0.00000000                                 | 0.00000000  | 0.09024000 |
| 2  | Ag   | 0.00219798                                 | 0.00032392  | 0.41276533 |
| 3  | Ag   | 0.22393815                                 | 0.11317292  | 0.30672523 |
| 4  | Ag   | 0.11111000                                 | 0.22222000  | 0.19797000 |
| 5  | Ag   | 0.33333001                                 | 0.00000000  | 0.09024000 |
| 6  | Ag   | 0.32944699                                 | -0.00653449 | 0.41204029 |
| 7  | Ag   | 0.55616619                                 | 0.11108886  | 0.30564055 |
| 8  | Ag   | 0.44444001                                 | 0.22222000  | 0.19797000 |
| 9  | Ag   | 0.66667002                                 | 0.00000000  | 0.09024000 |

|    |    |                  |             |            |
|----|----|------------------|-------------|------------|
| 10 | Ag | 0.66728459       | -0.00509545 | 0.41172657 |
| 11 | Ag | 0.88984263       | 0.10906595  | 0.30444197 |
| 12 | Ag | 0.77778000       | 0.22222000  | 0.19797000 |
| 13 | Ag | 1.00000000       | 0.33333001  | 0.09024000 |
| 14 | Ag | 1.00277900       | 0.32876738  | 0.41055799 |
| 15 | Ag | 0.22486153       | 0.44141418  | 0.30575957 |
| 16 | Ag | 0.11111000       | 0.55555999  | 0.19797000 |
| 17 | Ag | 0.33333001       | 0.33333001  | 0.09024000 |
| 18 | Ag | 0.33396341       | 0.33275284  | 0.42117981 |
| 19 | Ag | 0.55555292       | 0.44231508  | 0.30805936 |
| 20 | Ag | 0.44444001       | 0.55555999  | 0.19797000 |
| 21 | Ag | 0.66667002       | 0.33333001  | 0.09024000 |
| 22 | Ag | 0.66581416       | 0.31511902  | 0.41383597 |
| 23 | Ag | 0.88872971       | 0.44217461  | 0.30518424 |
| 24 | Ag | 0.77778000       | 0.55555999  | 0.19797000 |
| 25 | Ag | 1.00000000       | 0.66667002  | 0.09024000 |
| 26 | Ag | -0.00188350      | 0.66482482  | 0.41299243 |
| 27 | Ag | 0.21931711       | 0.77462628  | 0.30503908 |
| 28 | Ag | 0.11111000       | 0.88889003  | 0.19797000 |
| 29 | Ag | 0.33333001       | 0.66667002  | 0.09024000 |
| 30 | Ag | 0.32877572       | 0.66456941  | 0.41208375 |
| 31 | Ag | 0.55637961       | 0.77186058  | 0.30671683 |
| 32 | Ag | 0.44444001       | 0.88889003  | 0.19797000 |
| 33 | Ag | 0.66667002       | 0.66667002  | 0.09024000 |
| 34 | Ag | 0.66597769       | 0.67135823  | 0.41794197 |
| 35 | Ag | 0.88773059       | 0.77630476  | 0.30607319 |
| 36 | Ag | 0.77778000       | 0.88889003  | 0.19797000 |
| 37 | C  | 0.43695077       | 0.39367845  | 0.51532800 |
| 38 | O  | 0.41556935       | 0.48942502  | 0.54949555 |
| 39 | O  | 0.72181220       | 0.51395258  | 0.48425029 |
| 40 | H  | 0.46814520       | 0.29168398  | 0.53033318 |
| 41 | K  | -<br>0.060711833 | 0.488814471 | 0.54927842 |

|                     |             |            |             |
|---------------------|-------------|------------|-------------|
| Lattice vector 1[Å] | 8.77270031  | 0.00000000 | 0.00000000  |
| Lattice vector 2[Å] | -4.38635015 | 7.59738133 | 0.00000000  |
| Lattice vector 3[Å] | 0.00000000  | 0.00000000 | 22.16290092 |

### R13.HCOO\*= $\text{CO}_2^*$ + H\* on Ag (111)

| n° | atom | Relaxed atomic coordinates (cartesian) [Å] |            |            |
|----|------|--------------------------------------------|------------|------------|
| 1  | Ag   | 0.00000000                                 | 0.00000000 | 0.09024000 |
| 2  | Ag   | 0.00159770                                 | 0.00100819 | 0.41350296 |
| 3  | Ag   | 0.22284482                                 | 0.11154075 | 0.30565528 |

|    |    |            |            |            |
|----|----|------------|------------|------------|
| 4  | Ag | 0.11111000 | 0.22222000 | 0.19797000 |
| 5  | Ag | 0.33333000 | 0.00000000 | 0.09024000 |
| 6  | Ag | 0.33378156 | 0.00088421 | 0.41353533 |
| 7  | Ag | 0.55604972 | 0.11031111 | 0.30600731 |
| 8  | Ag | 0.44444001 | 0.22222000 | 0.19797000 |
| 9  | Ag | 0.66667002 | 0.00000000 | 0.09024000 |
| 10 | Ag | 0.66727817 | 0.00050968 | 0.41528932 |
| 11 | Ag | 0.88830672 | 0.11020441 | 0.30605628 |
| 12 | Ag | 0.77778000 | 0.22222000 | 0.19797000 |
| 13 | Ag | 1.00000000 | 0.33333001 | 0.09024000 |
| 14 | Ag | 0.99992469 | 0.33252376 | 0.41344515 |
| 15 | Ag | 0.22341525 | 0.44533135 | 0.30632199 |
| 16 | Ag | 0.11111001 | 0.55556001 | 0.19797000 |
| 17 | Ag | 0.33333001 | 0.33333001 | 0.09024000 |
| 18 | Ag | 0.33351990 | 0.33326068 | 0.41439746 |
| 19 | Ag | 0.55644536 | 0.44577499 | 0.30684168 |
| 20 | Ag | 0.44444001 | 0.55556001 | 0.19797000 |
| 21 | Ag | 0.66667002 | 0.33333001 | 0.09024000 |
| 22 | Ag | 0.66723009 | 0.33213010 | 0.41355592 |
| 23 | Ag | 0.88910729 | 0.44426126 | 0.30560911 |
| 24 | Ag | 0.77778000 | 0.55556001 | 0.19797000 |
| 25 | Ag | 1.00000000 | 0.66667002 | 0.09024000 |
| 26 | Ag | 0.00096451 | 0.66613455 | 0.41310658 |
| 27 | Ag | 0.22351479 | 0.77758067 | 0.30603041 |
| 28 | Ag | 0.11111000 | 0.88889003 | 0.19797000 |
| 29 | Ag | 0.33333001 | 0.66667002 | 0.09024000 |
| 30 | Ag | 0.33149355 | 0.66728609 | 0.41552148 |
| 31 | Ag | 0.55615043 | 0.77695962 | 0.30756918 |
| 32 | Ag | 0.44444001 | 0.88889003 | 0.19797000 |
| 33 | Ag | 0.66667002 | 0.66667002 | 0.09024000 |
| 34 | Ag | 0.67087399 | 0.66615209 | 0.41765139 |
| 35 | Ag | 0.88755124 | 0.77707255 | 0.30657093 |
| 36 | Ag | 0.77778000 | 0.88889003 | 0.19797000 |
| 37 | C  | 0.51174561 | 0.66736218 | 0.53588995 |
| 38 | H  | 0.41321378 | 0.51734506 | 0.53186282 |
| 39 | O  | 0.41237982 | 0.73078058 | 0.53761910 |
| 40 | O  | 0.67482590 | 0.72523166 | 0.53152714 |

|                     |             |            |             |
|---------------------|-------------|------------|-------------|
| Lattice vector 1[Å] | 8.77270031  | 0.00000000 | 0.00000000  |
| Lattice vector 2[Å] | -4.38635015 | 7.59738133 | 0.00000000  |
| Lattice vector 3[Å] | 0.00000000  | 0.00000000 | 22.16290092 |

**R13.HCOO\* = CO<sub>2</sub>\* + H\* on K/Ag (111)**

| n° | atom | Relaxed atomic coordinates (cartesian) [Å] |            |            |
|----|------|--------------------------------------------|------------|------------|
| 1  | Ag   | 0.00000000                                 | 0.00000000 | 0.09024000 |
| 2  | Ag   | 0.00075077                                 | 0.00119389 | 0.41398311 |
| 3  | Ag   | 0.22281805                                 | 0.11129938 | 0.30520982 |
| 4  | Ag   | 0.11111000                                 | 0.22222000 | 0.19797000 |
| 5  | Ag   | 0.33333001                                 | 0.00000000 | 0.09024000 |
| 6  | Ag   | 0.33294162                                 | 0.00027330 | 0.41302933 |
| 7  | Ag   | 0.55680974                                 | 0.11272167 | 0.30632802 |
| 8  | Ag   | 0.44444001                                 | 0.22222000 | 0.19797000 |
| 9  | Ag   | 0.66667002                                 | 0.00000000 | 0.09024000 |
| 10 | Ag   | 0.66780992                                 | 1.00046020 | 0.41325240 |
| 11 | Ag   | 0.88939830                                 | 0.11074532 | 0.30517059 |
| 12 | Ag   | 0.77778000                                 | 0.22222000 | 0.19797000 |
| 13 | Ag   | 1.00000000                                 | 0.33333001 | 0.09024000 |
| 14 | Ag   | 0.00074138                                 | 0.33414861 | 0.41153755 |
| 15 | Ag   | 0.22348739                                 | 0.44543728 | 0.30443173 |
| 16 | Ag   | 0.11111000                                 | 0.55555999 | 0.19797000 |
| 17 | Ag   | 0.33333001                                 | 0.33333001 | 0.09024000 |
| 18 | Ag   | 0.32961472                                 | 0.33349324 | 0.41190891 |
| 19 | Ag   | 0.55640558                                 | 0.44455412 | 0.30598027 |
| 20 | Ag   | 0.44444001                                 | 0.55555999 | 0.19797000 |
| 21 | Ag   | 0.66667002                                 | 0.33333001 | 0.09024000 |
| 22 | Ag   | 0.67112100                                 | 0.33632742 | 0.41424981 |
| 23 | Ag   | 0.88826076                                 | 0.44512481 | 0.30565709 |
| 24 | Ag   | 0.77778000                                 | 0.55555999 | 0.19797000 |
| 25 | Ag   | 1.00000000                                 | 0.66667002 | 0.09024000 |
| 26 | Ag   | 0.00268255                                 | 0.66850290 | 0.41353875 |
| 27 | Ag   | 0.22334445                                 | 0.77875478 | 0.30526811 |
| 28 | Ag   | 0.11111000                                 | 0.88889003 | 0.19797000 |
| 29 | Ag   | 0.33333001                                 | 0.66667002 | 0.09024000 |
| 30 | Ag   | 0.33400850                                 | 0.66751094 | 0.41301292 |
| 31 | Ag   | 0.55640478                                 | 0.77826500 | 0.30548523 |
| 32 | Ag   | 0.44444001                                 | 0.88889003 | 0.19797000 |
| 33 | Ag   | 0.66667002                                 | 0.66667002 | 0.09024000 |
| 34 | Ag   | 0.66761647                                 | 0.66874283 | 0.41304324 |
| 35 | Ag   | 0.88973938                                 | 0.77832643 | 0.30601265 |
| 36 | Ag   | 0.77778000                                 | 0.88889003 | 0.19797000 |
| 37 | C    | 0.57189090                                 | 0.41365816 | 0.57435792 |
| 38 | H    | 0.41529347                                 | 0.25269795 | 0.50964072 |
| 39 | O    | 0.44451949                                 | 0.42272477 | 0.59365102 |
| 40 | O    | 0.54317600                                 | 0.30852237 | 0.52368978 |
| 41 | K    | 0.15441749                                 | 0.40713858 | 0.56071167 |

|                     |             |            |             |
|---------------------|-------------|------------|-------------|
| Lattice vector 1[Å] | 8.77270031  | 0.00000000 | 0.00000000  |
| Lattice vector 2[Å] | -4.38635015 | 7.59738133 | 0.00000000  |
| Lattice vector 3[Å] | 0.00000000  | 0.00000000 | 22.16290092 |
